# Supplementary material
Source: PubMed Central journal article supplement (PMC8572466)
Supplement: 10020_2021_394_MOESM1_ESM.pdf [file 10020_2021_394_MOESM1_ESM.pdf]

# **Paediatric obesity: a systematic review and pathway mapping of metabolic alterations underlying early disease processes**

Margot DE SPIEGELEER<sup>a</sup>, Ellen DE PAEPE<sup>a</sup>, Lieven VAN MEULEBROEK<sup>a</sup>, Inge GIES<sup>b</sup>, Jean DE SCHEPPER<sup>b,c</sup> and Lynn VANHAECKE<sup>a,d,\*</sup>

<sup>a</sup> Laboratory of Chemical Analysis, Department of Translational Physiology, Infectiology and Public Health, Faculty of Veterinary Medicine, Ghent University, Salisburylaan 133, 9820 Merelbeke, Belgium;

<sup>b</sup> KidZ Health Castle, Universitair Ziekenhuis Brussel, Vrije Universiteit Brussel, Laarbeeklaan 101, 1090 Brussel, Belgium;

<sup>c</sup> Department of Internal Medicine and Pediatrics, Faculty of Medicine and Health Sciences, Ghent University, Corneel Heymanslaan 10, 9000 Ghent, Belgium;

<sup>d</sup> Institute for Global Food Security, School of Biological Sciences, Queen's University, University Road, Belfast, BT7 1NN, United Kingdom.

## **\*Corresponding Author**

Prof. dr. Lynn Vanhaecke

Ghent University – Faculty of Veterinary Medicine

Department of Translational Physiology, Infectiology and Public Health - Laboratory of Chemical Analysis

Salisburylaan 133, B-9820 Merelbeke, Belgium

Tel: +32 9 264 74 57; Fax: +32 9 264 74 92

E-mail: [Lynn.Vanhaecke@UGent.be](mailto:Lynn.Vanhaecke@UGent.be)

## **Table of content**

Additional Tables and Figure Titles (in bold) and Legends

Additional File 1:

### **Table S1. Pragmatic database search strategy according to the PICO framework**

### **Table S2. Quality assessment of the included case-control (n=22) and cohort studies (n=20) using the Newcastle-Ottawa Scale**

Quality assessment of the included cohort and case-control studies using the Newcastle-Ottawa Scale.

The scores for the three separate parts, consisting of selection, comparability and outcome assessment are displayed next to every article and the maximum score is indicated at the headings.

The three parts were: selection (0 – 4 points), comparability (0 – 2 points), and outcome assessment (0 – 3 points).

### **Table S3. Quality assessment of the included case series (n=1) using an adjusted Newcastle-Ottawa Scale**

This adjusted NOS consists of four parts: selection (0 – 1 point), ascertainment (0 – 2 points), causality (0 – 4 points, of which one was not included for the quality assessment of this study) and reporting (0 – 1 point).

### **Table S4. Compound database for MetScape 3**

Compounds (n=129) included in the pathway analysis of paediatric patients with overweight and obesity, combined with their KEGG ID, HMDB ID and PubChem ID.

### **Table S5. Pathway analysis using MetaboAnalyst 5.0**

Resultant pathway names (n=38) and their match status in childhood obesity. MetaboAnalyst settings imparted hypergeometric test as over-representation analysis method; relative betweenness centrality as node importance measure for topological analysis; pathway library homo sapiens for human studies. In general, small *P*-values and large pathway impact indicate the most relevant pathways. Yet, as pathway

impact and corresponding *P*-value are relative importance measures and thus greatly influenced by the number of imported differential (targeted) metabolites, only the number of hits was addressed as a relevant threshold in appointing the most important pathways altered in obesity.

### **Fig S1. Visualisation of pathway analysis, using MetaboAnalyst 4.0**

Pathway analysis of paediatric patients with overweight and obesity, with the most important pathways (> 5 hits) being: (1) aminoacyl-tRNA biosynthesis, (2) Valine, leucine and isoleucine biosynthesis, (3) Biosynthesis of unsaturated fatty acid, (4) Arginine biosynthesis, (5) Steroid hormone biosynthesis, (6) Pantothenate and CoA biosynthesis, (7) Primary bile acid synthesis, (8) Glycine, serine and threonine metabolism, (9) beta-Alanine metabolism (10) Histidine metabolism, (11) Alanine, aspartate and glutamate metabolism, (12) Steroid biosynthesis, (13) Glyoxylate and dicarboxylate metabolism, (14) Valine, leucine and isoleucine degradation (15) Arginine and proline metabolism, (16) Cysteine and methionine metabolism, (17) Tyrosine metabolism, (18) Galactose metabolism, (19) Purine metabolism, (20) Glutathione metabolism and (21) Linoleic metabolism.

### **Figure S2. The metabolic network and pathway mapping**

Compound-reaction based metabolic network using MetScape 3 with user-inputted compounds (red hexagons), linking metabolites (pink hexagons) and database generated reactions (beige rectangles) as nodes, linking compounds and reactions on the basis of metabolomic data sources (i.e. KEGG and Human Metabolome Database). Putative interactions among the altered metabolites in childhood obesity were visualised with a clear interplay of several pathways. The different shades of red, blue and green colored shapes refer to diverse pathways in lipid, carbohydrate and amino acid metabolism, respectively.

Additional File 2:

### **Table S1. Database including all data extracted from selected studies**

Database concerning altered metabolites in paediatric patients with overweight and obesity in separate excel file, including first author and title, year of publication, continent, country of the study, study

design, sample size, diagnostic criteria, characteristics of the study populations (age, tanner stage and sex), analytical technique, biological matrix studied and quantitative findings, if these were available.

## ADDITIONAL FIGURES

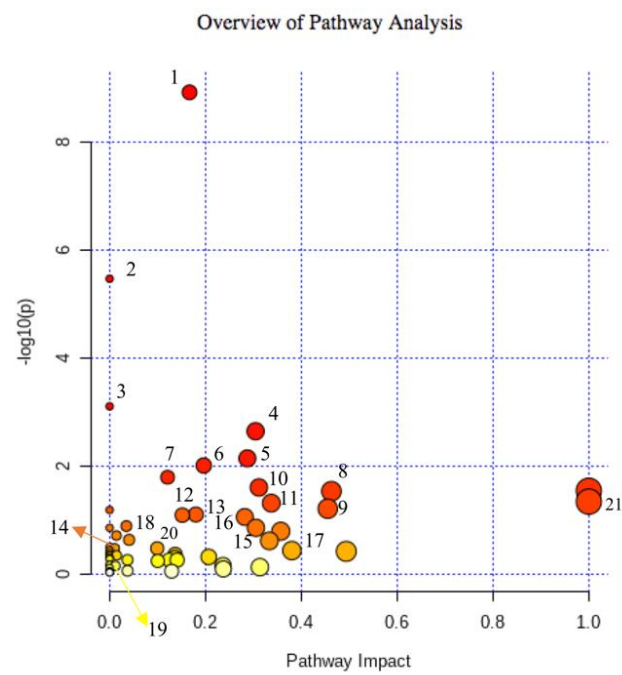

**Figure S1.** Visualisation of pathway analysis, using MetaboAnalyst 4.0

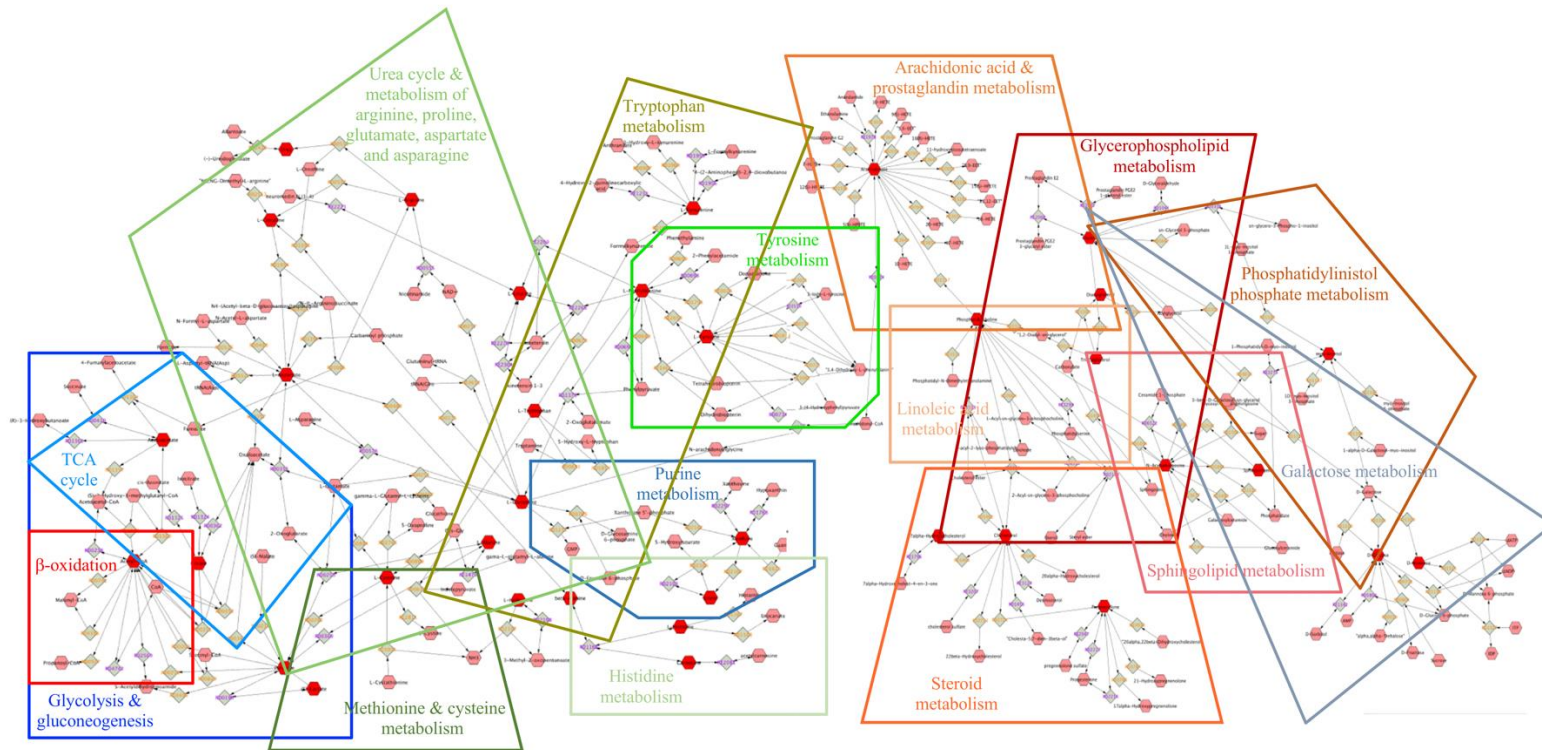

**Figure S2.** The metabolic network and pathway mapping

## ADDITIONAL TABLES

**Table S1.** Pragmatic database search strategy according to the PICO framework

|               | <b>FIELD</b>                          | <b>Search terms</b>                                                                                                                                                                                    |
|---------------|---------------------------------------|--------------------------------------------------------------------------------------------------------------------------------------------------------------------------------------------------------|
| Population    | Topic                                 | (‘Child*’ OR ‘Bab*’ OR ‘Boy*’ OR ‘Girl*’<br>OR ‘Infants’ OR ‘Neonate*’ OR<br>‘Childhood’ OR ‘Pub*’ OR ‘Pre-pubertal’<br>OR ‘Prepubertal’ OR ‘Adolescents’)                                             |
| AND           |                                       |                                                                                                                                                                                                        |
| Outcome       | Topic                                 | (“Type 2 diabetes” OR ‘Pre-diabetes’ OR<br>‘Prediabetes’ OR<br>“Impaired glucose tolerance” OR ‘Db2’ OR<br>‘T2D’ OR “Metabolic syndrome”<br>OR ‘MetS’ or ‘Obesity’ OR ‘IR’ OR "Insulin<br>resistance") |
| AND           |                                       |                                                                                                                                                                                                        |
|               |                                       | (‘Metabolomics’ OR ‘Metabolite’ OR<br>‘Lipid*’)                                                                                                                                                        |
| AND           |                                       |                                                                                                                                                                                                        |
|               |                                       | (‘Urine’ OR ‘Plasma’ OR ‘Serum’ OR<br>‘Blood’ OR ‘Excretion’ OR ‘Hair’ OR<br>‘*nail’ OR ‘Saliva’ OR ‘Feces’ OR ‘Faeces’)                                                                               |
| AND           |                                       |                                                                                                                                                                                                        |
| Type of study | Topic                                 | (‘Trial’ OR ‘Experiment’ OR ‘Study’ OR<br>‘Intervention’ OR ‘Cohort’)                                                                                                                                  |
| AND           |                                       |                                                                                                                                                                                                        |
| Limitations   | Language                              | English                                                                                                                                                                                                |
|               | Document type                         | Article                                                                                                                                                                                                |
|               | Year Published/<br>Publication Period | 2015 – 2021 (31/01/2021)                                                                                                                                                                               |

**Table S2.** Quality assessment according to the Newcastle-Ottawa Scale

| Continent                | Reference                        | Study design                      | Selection (4) | Comparability (2) | Outcome assessment (3) | Total (9)    |   |
|--------------------------|----------------------------------|-----------------------------------|---------------|-------------------|------------------------|--------------|---|
| ASIA                     | Cho <i>et al.</i> 2017           | Cohort                            | 4             | 2                 | 3                      | 9            |   |
|                          | Kim <i>et al.</i> 2016           | Case-control                      | 3             | 2                 | 2                      | 7            |   |
|                          | Lee <i>et al.</i> 2018           | Cohort                            | 3             | 2                 | 2                      | 7            |   |
|                          | Lee <i>et al.</i> 2019           | Cohort                            | 3             | 2                 | 2                      | 7            |   |
|                          | Son <i>et al.</i> 2019           | Case-control                      | 3             | 2                 | 3                      | 8            |   |
| AUSTRALIA                | Saner <i>et al.</i> 2018         | Cohort                            | 2             | 2                 | 3                      | 7            |   |
| EUROPE                   | <del>Ke <i>et al.</i> 2017</del> | <del>Cohort</del>                 | <del>4</del>  | <del>2</del>      | <del>2</del>           | <del>5</del> |   |
|                          | Anjos <i>et al.</i> 2019         | Case-control                      | 2             | 2                 | 2                      | 6            |   |
|                          | Hosking <i>et al.</i> 2019       | Cohort                            | 4             | 2                 | 2                      | 8            |   |
|                          | Lau <i>et al.</i> 2018           | Cohort                            | 4             | 2                 | 2                      | 8            |   |
|                          | Mangge <i>et al.</i> 2015        | Case-control                      | 3             | 2                 | 2                      | 7            |   |
|                          | Martos-Moreno <i>et al.</i> 2017 | Case-control                      | 3             | 2                 | 3                      | 8            |   |
|                          | Mastrangelo <i>et al.</i> 2016   | Case-control                      | 4             | 2                 | 2                      | 8            |   |
|                          | Reinehr <i>et al.</i> 2015       | Case-control                      | 3             | 2                 | 3                      | 8            |   |
|                          | Rocha <i>et al.</i> 2018         | Case-control                      | 3             | 2                 | 3                      | 8            |   |
|                          | Troisi <i>et al.</i> 2017        | Case-control                      | 3             | 2                 | 2                      | 7            |   |
|                          | Troisi <i>et al.</i> 2019        | Case-control                      | 3             | 2                 | 2                      | 7            |   |
|                          | Valle <i>et al.</i> 2015         | Case-control                      | 3             | 2                 | 2                      | 7            |   |
|                          | Wahl <i>et al.</i> 2012          | Case-control                      | 3             | 1                 | 2                      | 6            |   |
|                          | Wijnant <i>et al.</i> 2020       | Case-control                      | 2             | 2                 | 2                      | 6            |   |
|                          | Zhang <i>et al.</i> 2019         | Cohort                            | 2             | 2                 | 3                      | 7            |   |
|                          | AMERICA                          | Chavira-Suarez <i>et al.</i> 2020 | Case-control  | 4                 | 2                      | 3            | 8 |
|                          |                                  | Flannagan <i>et al.</i> 2018      | Cohort        | 3                 | 2                      | 2            | 7 |
|                          |                                  | Goffredo <i>et al.</i> 2017       | Case-control  | 3                 | 2                      | 3            | 8 |
|                          |                                  | Higgins <i>et al.</i> 2020        | Cohort        | 3                 | 2                      | 3            | 8 |
|                          |                                  | Mauras <i>et al.</i> 2015         | Case-control  | 3                 | 2                      | 3            | 8 |
| Perng <i>et al.</i> 2018 |                                  | Cohort                            | 4             | 2                 | 3                      | 9            |   |
| Perng <i>et al.</i> 2020 |                                  | Case-control                      | 2             | 2                 | 3                      | 7            |   |
| Short <i>et al.</i> 2019 |                                  | Case-control                      | 3             | 2                 | 3                      | 8            |   |



|                                               |              |   |   |   |   |
|-----------------------------------------------|--------------|---|---|---|---|
| Sorrow <i>et al.</i><br>2019                  | Case-control | 4 | 2 | 2 | 5 |
| Syme <i>et al.</i><br>2019                    | Cohort       | 4 | 2 | 4 | 4 |
| Trico <i>et al.</i><br>2017                   | Cohort       | 4 | 2 | 3 | 9 |
| Trico <i>et al.</i><br>2019                   | Case-control | 3 | 2 | 3 | 8 |
| Aristizabal <i>et al.</i> 2017                | Case-control | 3 | 2 | 2 | 7 |
| Bermudez-Cardona and Velasquez-Rodriguez 2016 | Case-control | 3 | 2 | 3 | 8 |
| Butte <i>et al.</i><br>2015                   | Cohort       | 4 | 2 | 2 | 8 |
| Cormack <i>et al.</i><br>2013                 | Cohort       | 2 | 2 | 2 | 6 |
| Farook <i>et al.</i><br>2015                  | Case-control | 4 | 2 | 2 | 8 |
| Moran-Ramos <i>et al.</i> 2017                | Cohort       | 4 | 2 | 2 | 8 |
| Perng <i>et al.</i><br>2017                   | Cohort       | 3 | 2 | 3 | 8 |
| Perng <i>et al.</i><br>2019                   | Cohort       | 3 | 2 | 3 | 8 |
| Newbern <i>et al.</i><br>2014                 | Cohort       | 3 | 2 | 3 | 8 |

---

**Table S3.** Quality assessment of the included case series (n=1) using an adjusted Newcastle-Ottawa Scale.

| <b>Continent</b> | <b>Reference</b>      | <b>Selection<br/>(1)</b> | <b>Ascertainment<br/>(2)</b> | <b>Causality<br/>(3)</b> | <b>Reporting<br/>(1)</b> | <b>Total<br/>(7)</b> |
|------------------|-----------------------|--------------------------|------------------------------|--------------------------|--------------------------|----------------------|
| ASIA             | Suzuki et al.<br>2019 | 0                        | 2                            | 2                        | 1                        | 5                    |

**Table S4.** Compound database for MetScape 3

|    | <b>Component</b>                           | <b>KEGG ID</b> | <b>HMDB ID</b> |
|----|--------------------------------------------|----------------|----------------|
| 1  | 1-methylhistidine                          | C01152         |                |
| 2  | 13-OxoODE                                  | C14765         |                |
| 3  | 16a-Hydroxyestrone                         | C05300         |                |
| 4  | 17-OH-pregnenolone                         | C18038         |                |
| 5  | 2-aminoadipic acid                         | C00956         |                |
|    | 2-hydroxyacetaminophen sulfate             |                | HMDB0062547    |
| 6  | 2-ketobutyric acid                         | C00109         |                |
| 7  | 2-methoxy-estradiol                        | C05302         |                |
|    | 2-methoxyacetaminophen glucuronide         |                | HMDB0240215    |
|    | 2-Methylbutyrylcarnitine                   |                | HMDB0000378    |
| 8  | 2-oxovaleric acid                          | C06255         |                |
|    | 2-palmitoylglycerol                        |                | HMDB0011533    |
|    | 2-piperidinone                             |                | HMDB0011749    |
| 9  | 24S-hydroxycholesterol                     | C13550         |                |
|    | 3-(N-acetyl-L-cystein-S-yl) acetaminophen  |                | HMDB0240217    |
| 10 | 3-hydroxybutyrate                          | C01089         |                |
| 11 | 3-Hydroxyquinine                           | C07344         |                |
| 12 | 3-methyl-2-oxovaleric acid                 | C03465         |                |
| 13 | 3,4-dihydroxyphenylalanine                 | C00355         |                |
| 14 | 3beta-7alpha-dihydroxy-5-cholestenoic acid | C17335         |                |
| 15 | 3beta-Hydroxy-5-cholestenoic acid          | C17333         |                |
|    | 4-androsten-3beta,17beta-diol disulfate    |                | HMDB0240313    |
|    | 4-deoxyerythronic acid                     |                | HMDB0000498    |
| 16 | 4-hydroxyproline                           | C01157         |                |
| 17 | 4-methyl-2-oxopentanoic acid               | C00233         |                |
| 18 | 5-oxoproline                               | C01879         |                |
| 19 | 7alpha-hydroxy-3-oxo-4-cholestenoic acid   | C17337         |                |
| 20 | 7alpha-hydroxycholesterol                  | C03594         |                |
|    | 7beta-hydroxycholesterol                   |                | HMDB0006119    |
| 21 | 9-OxoODE                                   | C14766         |                |
| 22 | Acetic acid                                | C00033         |                |
| 23 | Acetoacetic acid                           | C00164         |                |
| 24 | L-acetylcarnitine                          | C02571         |                |
| 25 | L-alanine                                  | C01401         |                |
|    | L-alloisoleucine                           |                | HMDB0000557    |
| 26 | alpha-aminoisobutric acid                  | C03665         |                |
| 27 | alpha-hydroxybutyric acid                  | C05984         |                |
| 28 | alpha-linolenic acid 18:3(n-3)             | C06427         |                |
| 29 | Androstenedione                            | C00280         |                |
| 30 | Androsterone                               | C00523         |                |
|    | Androsterone sulfate                       |                | HMDB0002759    |
| 31 | Arachidonic acid 20:4(n-6)                 | C00219         |                |
| 32 | L-arginine                                 | C00062         |                |
| 33 | L-asparagine                               | C00152         |                |
| 34 | L-Aspartic acid                            | C00049         |                |
| 35 | Behenic acid                               | C08281         |                |
| 36 | beta-alanine                               | C00099         |                |
| 37 | Bradykinin                                 | C00306         |                |
| 38 | Butyryl-L-carnitine                        | C02862         |                |
| 39 | Campesterol                                | C01789         |                |
| 40 | Caprylic acid                              | C06423         |                |
| 41 | Carnosine                                  | C00386         |                |
| 42 | Chenodeoxycholic acid                      | C02528         |                |
| 43 | Cholesterol                                | C00187         |                |
| 44 | Cholesteryl arachidonate                   | C02530         |                |
| 45 | Citrate/Citric acid                        | C00158         |                |
| 46 | Citrulline                                 | C00327         |                |

|    |                                  |        |             |
|----|----------------------------------|--------|-------------|
| 47 | Cortisone                        | C00762 |             |
| 48 | Cystathionine                    | C00542 |             |
| 49 | L-Cysteine                       | C00097 |             |
| 50 | D-Glucose                        | C00031 |             |
| 51 | D-Maltose                        | C00208 |             |
| 52 | D-Mannose                        | C00159 |             |
|    | Decanoylcarnitine                |        | HMDB0000651 |
|    | Decenoylcarnitine                |        | HMDB0013205 |
| 53 | Dehydroepiandrosterone           | C01227 |             |
| 54 | Dehydroepiandrosterone sulfate   | C04555 |             |
| 55 | DAG 16:0/16:0                    | C00165 |             |
| 56 | Dihomo-gamma-linolenic 20:3(n-6) | C03242 |             |
| 57 | Docosahexaenoic acid 22:6(n-3)   | C06429 |             |
|    | Docosapentaenoic acid 20:5(n-3)  |        | HMDB0001976 |
|    | Dodecanoylcarnitine              |        | HMDB0002250 |
| 58 | Dodecenedioic acid               | C16308 |             |
|    | Dodecenoylcarnitine              |        | HMDB0013326 |
| 59 | Dopamine                         | C03758 |             |
| 60 | Eicosapentaenoic acid 20:5(n-3)  | C06428 |             |
|    | Epiandrosterone sulfate          |        | HMDB0062657 |
| 61 | Estradiol                        | C00951 |             |
| 62 | DL-Glutamate                     | C00302 |             |
| 63 | L-glutamine                      | C00064 |             |
| 64 | Glycerol                         | C00116 |             |
| 65 | Glycine                          | C00037 |             |
| 66 | Glycodeoxycholate                | C05464 |             |
|    | Hexadecenoylcarnitine            |        | HMDB0013207 |
|    | Hexanoylcarnitine                |        | HMDB0000756 |
| 67 | L-Histidine                      | C00135 |             |
|    | Hydroxyisovalerylcarnitine       |        | HMDB0061189 |
|    | Hydroxypropionylcarnitine        |        | HMDB0013125 |
|    | Hydroxyvalerylcarnitine          |        | HMDB0013132 |
|    | Indole-3-propionic acid          |        | HMDB0002302 |
| 68 | L-Isoleucine                     | C00407 |             |
| 69 | Isovalerylcarnitine              | C20826 |             |
| 70 | Kynurenic acid                   | C01717 |             |
| 71 | L-Carnitine                      | C00318 |             |
| 72 | L-Kynurenine                     | C01718 |             |
|    | L-Thyronine                      |        | HMDB0000667 |
| 73 | (S)-Lactate                      | C00186 |             |
| 74 | Lanosterol                       | C01724 |             |
| 75 | Lathosterol                      | C01189 |             |
| 76 | Lauric acid                      | C02679 |             |
| 77 | L-Leucine                        | C00123 | HMDB0000687 |
| 78 | Linoleic-18:2(n-6)               | C01595 |             |
|    | Linoleylcarnitine (C18:2)        |        | HMDB0006469 |
| 79 | Lithocholic acid                 | C03990 |             |
|    | LysoPC 20:4                      |        |             |
|    | LysoPC 18:1                      |        | HMDB0002815 |
|    | LysoPC 18:2                      |        | HMDB0010386 |
| 80 | L-Lysine                         | C00047 |             |
| 81 | LysoPC 14:1                      | C04230 |             |
| 82 | LysoPC 16:0                      | C04230 |             |
| 83 | LysoPC 14:0                      | C04230 |             |
| 84 | LysoPC 16:1                      | C04230 |             |
| 85 | LysoPC 17:0                      | C04230 |             |
|    | LysoPC 18:1                      |        | HMDB0002815 |
|    | LysoPC 18:2                      |        | HMDB0010386 |
|    | Malonylcarnitine                 |        | HMDB0002095 |
|    | Malvidin 3-(6-acetyl glucoside)  |        | HMDB0038008 |

|     |                                                     |        |             |
|-----|-----------------------------------------------------|--------|-------------|
| 86  | L-Methionine                                        | C00073 |             |
|     | Methylglutarylcarnitine C6DC                        |        |             |
| 87  | Myo-inositol                                        | C00137 |             |
| 88  | Myristic acid                                       | C06424 |             |
| 89  | N-acetyl galactosamine                              | C05021 |             |
|     | N-acetyl glycine                                    |        | HMDB0000532 |
| 90  | N,N-dimethylarginine                                | C03626 |             |
| 91  | Naringenin                                          | C00509 |             |
|     | Nonaoylcarnitine                                    |        | HMDB0013288 |
| 92  | Octanoylcarnitine                                   | C02838 |             |
| 93  | Octenoylcarnitine                                   | C02838 |             |
| 94  | Oleic acid                                          | C00712 |             |
| 95  | Ornithine                                           | C01602 |             |
|     | P-acetamidophenyl glucuronide                       |        | HMDB0010316 |
| 96  | Palmitic acid                                       | C00249 |             |
| 97  | Palmitoleic acid                                    | C08362 |             |
| 98  | Palmitoyl-linoleoyl-glycerol (16:0/18:2)            | C00165 |             |
| 99  | L-palmitoylcarnitine                                | C02990 |             |
| 100 | Panthenate/coenzym A                                | C00010 |             |
|     | PC 44:10                                            |        | HMDB0008713 |
|     | PC 28:1, PC(14:1/14:0)                              |        | HMDB0007867 |
|     | PC 30:2, PC(14:1(9Z)/16:1(9Z))                      |        | HMDB0007998 |
|     | PC 32:2 (16:1/16:1)                                 |        | HMDB0013411 |
|     | PC 34:1, PC(16:0/18:1(11Z))                         |        | HMDB0007971 |
|     | PC 34:2, PC(18:1(9Z)/16:1(9Z))                      |        | HMDB0013413 |
|     | PC 34:4, PC(18:4(6Z,9Z,12Z,15Z)/16:0)               |        | HMDB0008258 |
| 101 | PC 36:1, PC(14:0/22:1(13Z))                         | C00157 |             |
|     | PC 38:0, PC(20:0/18:0)                              |        | HMDB0008043 |
|     | PC 38:6, PC(22:6(4Z,7Z,10Z,13Z,16Z,19Z)/P-16:0)     |        | HMDB0011229 |
|     | PC 40:6, PC(22:5(4Z,7Z,10Z,13Z,16Z)/P-18:1(9Z))     |        | HMDB0011326 |
|     | PC ae C34:1, PC(O-16:1(9Z)/18:0)                    |        | HMDB0013426 |
|     | PC ae C34:2, PC(O-16:1(9Z)/18:2)                    |        | HMDB0011151 |
|     | PC ae C34:3, PC(O-16:1(9Z)/18:2(9Z,12Z))            |        | HMDB0013413 |
|     | PC ae C36:2, PC(O-18:0/18:2(9Z,12Z))                |        | HMDB0013418 |
|     | PC ae C36:3, PC(O-18:1/18:2(9Z,12Z))                |        | HMDB0013429 |
|     | PC ae C38:2, PC(O-18:1(9Z)/20:1(11Z))               |        | HMDB0013431 |
|     | PC ae C38:5, PC(O-18:1(9Z)/20:4(8Z,11Z,14Z,17Z))    |        | HMDB0013432 |
|     | PC ae C38:6, PC(O-16:0/22:6(4Z,7Z,10Z,13Z,16Z,19Z)) |        | HMDB0013409 |
|     | PC ae C44:4, PC(O-22:1(13Z)/22:3(10Z,13Z,16Z))      |        | HMDB0013453 |
|     | PC ae C44:5, PC(O-22:2(13Z,16Z)/22:3(10Z,13Z,16Z))  |        | HMDB0013456 |
|     | PE 30:3                                             |        |             |
|     | PE 38:9                                             |        | HMDB0009203 |
|     | PE 42:9                                             |        | HMDB0009406 |
| 102 | L-Phenylalanine                                     | C00079 | HMDB0000159 |
| 103 | Phosphatidylethanolamine                            | C00346 |             |
|     | PI 34:1, PI(16:0/18:1(9Z))                          |        | HMDB0009799 |
|     | PI 34:2, PI(18:1(9Z)/16:1(9Z))                      |        | HMDB0009799 |
|     | PI 36:1                                             |        | HMDB0240667 |
|     | PI 36:2, PI(18:2(9Z,12Z)/18:0)                      |        | HMDB0009807 |
|     | PI 36:3, PI(18:2(9Z,12Z)/18:1(9Z))                  |        | HMDB0009840 |
|     | PI 36:4, PI(18:1(9Z)/18:3(9Z,12Z,15Z))              |        | HMDB0009840 |
|     | PI 38:3, PI(20:1(11Z)/18:2(9Z,12Z))                 |        | HMDB0009872 |
|     | PI 38:4, PI(20:4(5Z,8Z,11Z,14Z)/18:0)               |        | HMDB0009815 |
|     | PI 38:5, PI(16:2(9Z,12Z)/22:3(10Z,13Z,16Z))         |        | HMDB0009804 |

|     |                                       |        |             |
|-----|---------------------------------------|--------|-------------|
| 104 | Piperidine                            | C01746 |             |
| 105 | Pregnenolone                          | C01953 |             |
| 106 | Pregnenolone sulfate                  | C18044 |             |
| 107 | Proline                               | C00148 |             |
| 108 | Propionylcarnitine                    | C03017 |             |
|     | PS 30:2, PS(16:1(9Z)/14:1(9Z))        |        | HMDB0012333 |
| 109 | Putrescine                            | C00134 |             |
| 110 | Pyroglutamic acid                     | C02237 |             |
| 111 | Pyruvic acid                          | C00022 |             |
| 112 | L-Serine                              | C00065 |             |
| 113 | SM (OH) 14:1, SM(d18:0/14:1(9Z)(OH))  | C00550 |             |
| 114 | SM (OH) 16:1, SM(d18:0/16:1(9Z)(OH))  | C00550 |             |
| 115 | SM (OH) 22:1, SM(d18:0/22:1(13Z)(OH)) | C00550 |             |
|     | SM 16:0                               |        | HMDB0010169 |
| 116 | Stearic acid                          | C01530 |             |
|     | Stearoylcarnitine                     |        | HMDB0000848 |
| 117 | Stigmasterol                          | C05442 |             |
| 118 | Taurodeoxycholic acid                 | C05463 |             |
| 119 | Taurolithocholate 3-sulfate           | C03642 |             |
| 120 | Testosterone                          | C00535 |             |
| 121 | L-Threonine                           | C00188 |             |
| 122 | Thymine                               | C00178 |             |
| 123 | Trimethylamine-N-oxide                | C00565 |             |
| 124 | L-Tryptophan                          | C00078 |             |
| 125 | L-Tyrosine                            | C00082 |             |
| 126 | Urea                                  | C00086 |             |
| 127 | Uric acid                             | C00366 |             |
|     | Valerylcarnitine                      |        | HMDB0013128 |
| 128 | L-Valine                              | C00183 |             |
| 129 | Xanthine                              | C00385 |             |

---

**Table S5.** Pathway analysis using MetaboAnalyst 5.0

| Pathway                                             | Total | Hits | Corrected<br><i>p</i> -value | Impact |
|-----------------------------------------------------|-------|------|------------------------------|--------|
| Aminoacyl-tRNA biosynthesis                         | 48    | 18   | 1.42E-09                     | 0.17   |
| Valine, leucine and isoleucine biosynthesis         | 8     | 6    | 3.65E-06                     | 0.01   |
| Biosynthesis of unsaturated fatty acids             | 36    | 9    | 8.51E-04                     | 0.01   |
| Arginine biosynthesis                               | 14    | 5    | 2.40E-03                     | 0.30   |
| Steroid hormone biosynthesis                        | 85    | 12   | 7.90E-03                     | 0.29   |
| Pantothenate and CoA biosynthesis                   | 19    | 5    | 1.03E-02                     | 0.12   |
| Primary bile acid biosynthesis                      | 46    | 8    | 1.72E-02                     | 0.12   |
| Histidine metabolism                                | 16    | 4    | 2.60E-02                     | 0.31   |
| Phenylalanine, tyrosine and tryptophan biosynthesis | 4     | 2    | 1.53E-02                     | 1.00   |
| Glycine, serine and threonine metabolism            | 33    | 6    | 1.51E-02                     | 0.46   |
| Linoleic acid metabolism                            | 5     | 2    | 4.70E-02                     | 1.00   |
| Alanine, aspartate and glutamate metabolism         | 28    | 5    | 5.10E-02                     | 0.34   |
| beta-Alanine metabolism                             | 21    | 4    | 6.43 E-02                    | 0.46   |
| D-Glutamine and D-glutamate metabolism              | 6     | 2    | 6.72E-02                     | 0.00   |
| Glyoxylate and dicarboxylate metabolism             | 32    | 5    | 8.30E-02                     | 0.18   |
| Steroid biosynthesis                                | 42    | 6    | 8.53E-02                     | 0.15   |
| Cysteine and methionine metabolism                  | 33    | 5    | 9.20E-02                     | 0.28   |
| Galactose metabolism                                | 27    | 4    | 1.35E-01                     | 0.03   |
| Arginine and proline metabolism                     | 38    | 5    | 1.43E-01                     | 0.31   |
| Glutathione metabolism                              | 28    | 4    | 1.49E-01                     | 0.11   |
| Phenylalanine metabolism                            | 10    | 2    | 1.64E-01                     | 0.36   |
| Sphingolipid metabolism                             | 21    | 3    | 1.97E-01                     | 0.01   |
| Propanoate metabolism                               | 23    | 3    | 8.64E-01                     | 0.04   |
| alpha-Linolenic acid metabolism                     | 13    | 2    | 2.47E-01                     | 0.33   |
| Valine, leucine and isoleucine degradation          | 40    | 4    | 3.39E-01                     | 0.01   |
| Tyrosine metabolism                                 | 42    | 4    | 3.73E-01                     | 0.38   |
| Starch and sucrose metabolism                       | 18    | 2    | 3.86E-01                     | 0.49   |
| Citrate cycle (TCA cycle)                           | 20    | 2    | 4.39E-01                     | 0.134  |
| Fatty acid biosynthesis                             | 47    | 4    | 4.59E-01                     | 0.01   |
| Pyruvate metabolism                                 | 22    | 2    | 4.90E-01                     | 0.21   |
| Glycerophospholipid metabolism                      | 36    | 3    | 5.01E-01                     | 0.14   |
| Pyrimidine metabolism                               | 39    | 3    | 5.57E-01                     | 0.04   |
| Fatty acid degradation                              | 39    | 3    | 5.57E-01                     | 0.12   |
| Lysine degradation                                  | 25    | 2    | 5.60E-01                     | 0.14   |
| Glycolysis / Gluconeogenesis                        | 26    | 2    | 5.82E-01                     | 0.10   |
| Purine metabolism                                   | 65    | 4    | 7.19E-01                     | 0.01   |
| Arachidonic acid metabolism                         | 36    | 2    | 7.57E-01                     | 0.31   |
| Tryptophan metabolism                               | 41    | 2    | 8.18E-01                     | 0.24   |
